# Supplementary material
Source: Springer Nature journal article supplement (https://www.springermedizin.de/resource/supplementary/13024_2014_544_MOESM5_ESM.pdf/9644364)
Supplement: MOESM5 [file 9644364]

**Supplemental Table S3. Associations of bacterial abundances with body weight.**

| <b>taxa</b>                       | <b>Slope</b>             | <b>R square</b> | <b>p value</b> |
|-----------------------------------|--------------------------|-----------------|----------------|
| Bacteroidetes                     | -0.002756 ± 0.0006099    | 0.3495          | 0.0001         |
| Firmicutes                        | 0.002759 ± 0.0006103     | 0.3498          | 0.0001         |
| Bacteroidia                       | -0.002776 ± 0.0006155    | 0.3486          | 0.0001         |
| Bacilli                           | 0.0001799 ± 4.064e-005   | 0.3403          | 0.0001         |
| Clostridia                        | 0.002896 ± 0.0006277     | 0.3591          | 0.0001         |
| Erysipelotrichia                  | -0.0003175 ± 7.042e-005  | 0.3485          | 0.0001         |
| Bacteroidales                     | -0.002776 ± 0.0006155    | 0.3486          | 0.0001         |
| Lactobacillales                   | 0.0001825 ± 4.060e-005   | 0.3471          | 0.0001         |
| Clostridiales                     | 0.002896 ± 0.0006277     | 0.3591          | 0.0001         |
| Erysipelotrichales                | -0.0003175 ± 7.042e-005  | 0.3485          | 0.0001         |
| Streptococcaceae                  | 6.102e-005 ± 1.012e-005  | 0.489           | 0.0001         |
| Clostridiaceae_1                  | -0.0004780 ± 9.020e-005  | 0.4249          | 0.0001         |
| Lachnospiraceae                   | 0.002492 ± 0.0005078     | 0.388           | 0.0001         |
| Porphyromonadaceae                | -0.002776 ± 0.0006156    | 0.3486          | 0.0001         |
| Erysipelotrichaceae               | -0.0003175 ± 7.042e-005  | 0.3485          | 0.0001         |
| Ruminococcaceae                   | 0.0005949 ± 0.0001923    | 0.2012          | 0.0037         |
| Lactobacillaceae                  | 0.0001214 ± 3.995e-005   | 0.1955          | 0.0043         |
| Clostridiales_Incertae_Sedis_XIII | 8.926e-007 ± 3.416e-007  | 0.1558          | 0.0129         |
| Microbacteriaceae                 | 7.868e-008 ± 3.026e-008  | 0.1544          | 0.0133         |
| Bacillales                        | -2.547e-006 ± 1.005e-006 | 0.1446          | 0.0155         |
| Gammaproteobacteria               | 1.005e-005 ± 3.993e-006  | 0.143           | 0.0161         |
| Proteobacteria                    | 1.269e-005 ± 5.423e-006  | 0.1259          | 0.0246         |
| Staphylococcaceae                 | -2.073e-006 ± 8.873e-007 | 0.1256          | 0.0248         |
| Bacteroidaceae                    | 2.696e-007 ± 1.184e-007  | 0.123           | 0.0286         |
| Xanthomonadaceae                  | 1.076e-006 ± 4.842e-007  | 0.1178          | 0.0324         |
| Enterobacteriales                 | 2.106e-006 ± 9.845e-007  | 0.1075          | 0.0389         |
| Enterobacteriaceae                | 2.106e-006 ± 9.845e-007  | 0.1075          | 0.0389         |
| Rhizobiales                       | 5.527e-007 ± 2.618e-007  | 0.105           | 0.0414         |

**Benjamini-Hochberg****p value**

0.00280

0.00140

0.00093

0.00070

0.00056

0.00047

0.00040

0.00035

0.00031

0.00028

0.00025

0.00023

0.00022

0.00020

0.00019

0.00648

0.00708

0.02007

0.01960

0.02170

0.02147

0.03131

0.03019

0.03337

0.03629

0.04189

0.04034

0.04140
